# Supplementary material for: Chiral differentiation of novel isoxazoline derivatives on “clicked” thioether and triazole bridged cyclodextrin chiral stationary phases
Source: Royal Society of Chemistry journal article supplement (doi:10.1039/c4ra03476g), 2014-01-01
Supplement: c4ra03476g1.pdf [file c4ra03476g1.pdf]

## Supporting information

### Chiral differentiation of novel isoxazoline derivatives on “clicked” thioether and triazole bridged cyclodextrin chiral stationary phases

Xiaobin Yao, Yan Gong, Rehangu Mamuti, Wenwen Xing, Hao Zheng, Xiangyang Tang\*,  
Yong Wang\*

Department of Chemistry, School of Science, Tianjin University, Tianjin 300072, China

#### 1. Preparation of **CSP1** and **CSP2**

The click syntheses of **CSP1** and **CSP2** were depicted in Figure S1.

##### Synthesis of **CSP1**

Alkynyl functionalized silica (3 g) was suspended in a solution of  $\beta$ -CD derivatives in DMF (30 mL) and then  $\text{CuI}(\text{PPh}_3)$  (10 mmol %) was added. The reaction mixture was heated to 80 °C and kept for two days. The crude products were washed with DMF and thereafter extracted with acetone/methanol for 24 h before being vacuum dried to afford the final **CSP1**. Characterization: FTIR ( $\text{cm}^{-1}$ , KBr): 2940, 3400. Anal. found: C 13.63%, H 2.51%, N 1.42%.

##### Synthesis of **CSP2**

Cationic CD (1.5 g) was added to a 20 mL of MeOH and DI water mixture (1:1, v/v) under stirring. After dissolving, thiol silica (3 g) and AIBN (50 mg) was added into the clear solution. The reaction mixture was stirred for 24 h with the protection of  $\text{N}_2$ . After that, the crude product was obtained by filtration and washed with DI water ( $2 \times 20$  mL), MeOH ( $2 \times 20$  mL) and acetone ( $2 \times 20$  mL) subsequently and vacuum dried at 60 °C (0.1 mbar) to afford the desired **CSP2**. Characterization: FTIR ( $\text{cm}^{-1}$ , KBr): 2900. Anal. found: C 9.59%, H 1.70%, N 0.48%.

#### 2. Figures

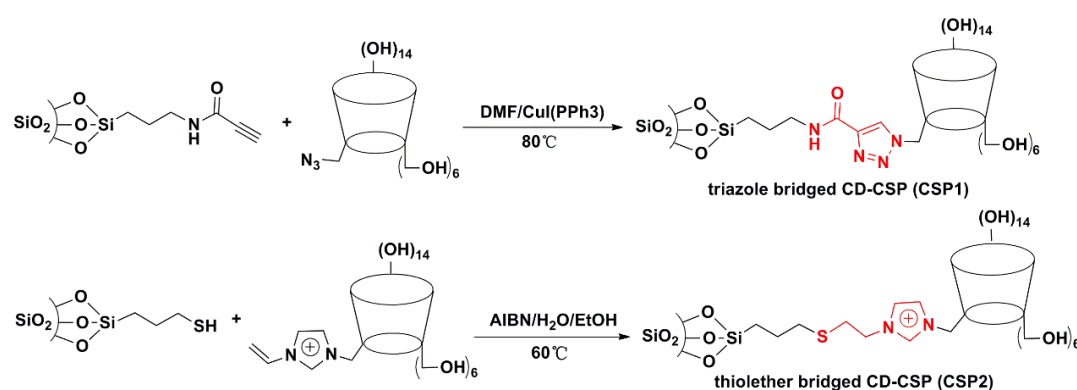

Figure S1 Click syntheses of **CSP1** and **CSP2**

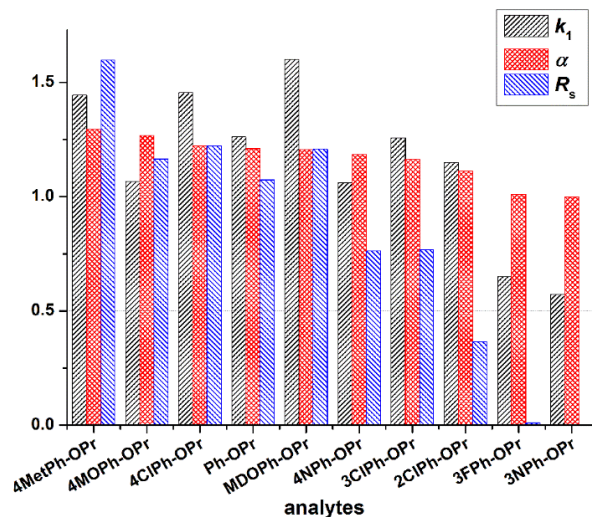

Figure S2 Enantioseparation of Ar-OPr on **CSP1**. Separation conditions: ACN/H<sub>2</sub>O (v/v)=30/70, flow rate = 0.6 mL·min<sup>-1</sup>, 25 °C

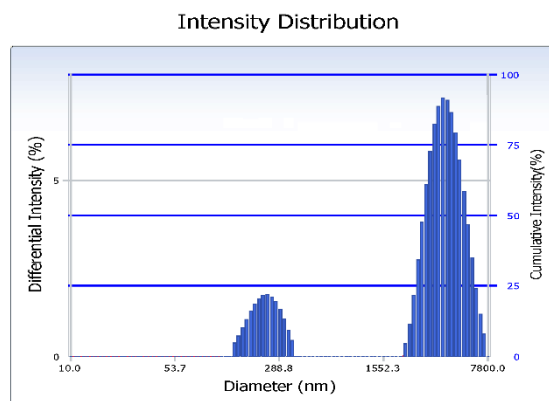

Distribution Results (Contin)

| Peak    | Diameter (nm) | Std. Dev. |
|---------|---------------|-----------|
| 1       | 222.3         | 1,106.8   |
| 2       | 4,771.8       | 61.5      |
| 3       | 0.0           | 0.0       |
| 4       | 0.0           | 0.0       |
| 5       | 0.0           | 0.0       |
| Average | 4,023.7       | 195.2     |

Figure S3 Particle size distribution of **CSP1**

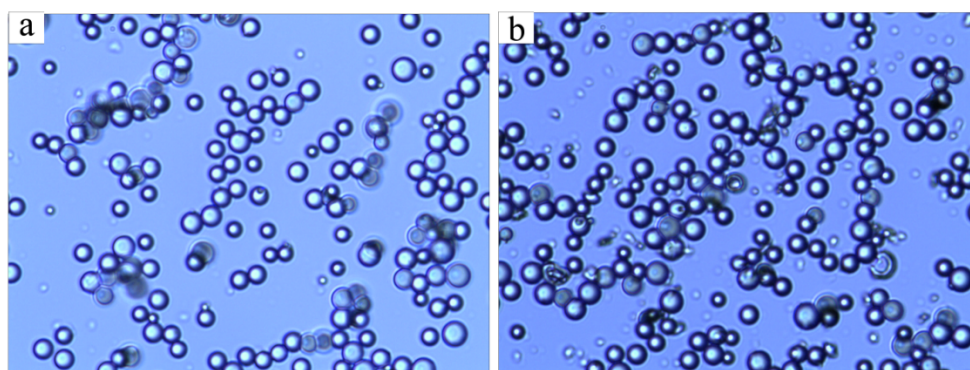

Figure S4 Electron Microscopy images of bare silica (a) and **CSP1** (b)

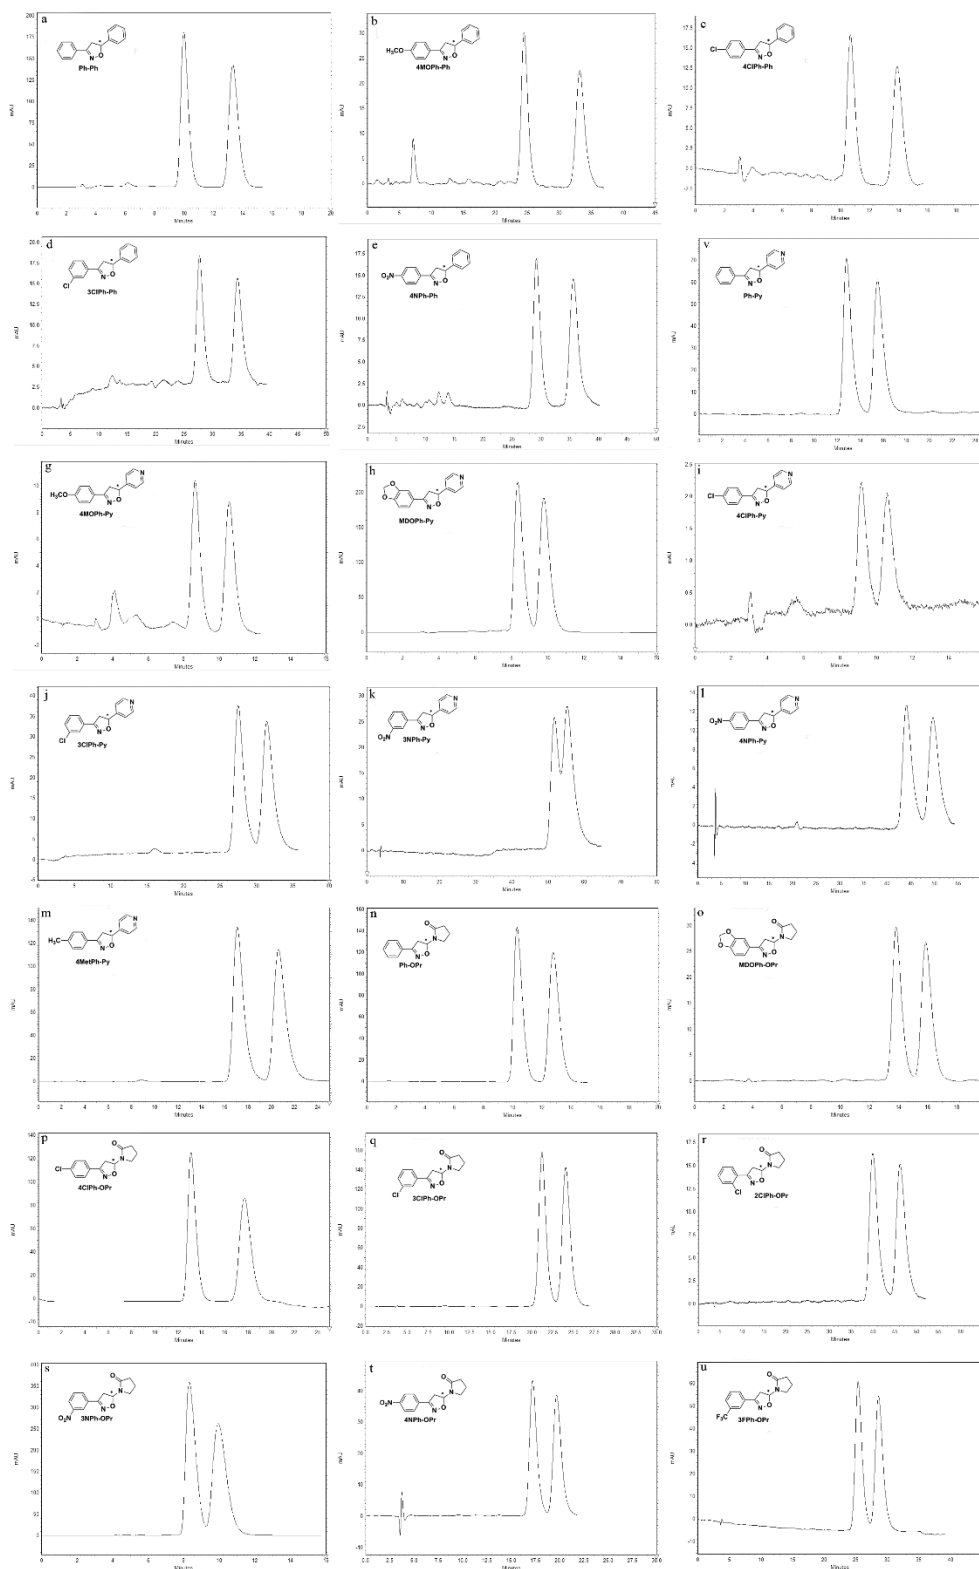

Figure S5 Chromatograms of analytes separated on **CSP1**. Separation conditions: (a, c, g, h, i) ACN/H<sub>2</sub>O (v/v)=40/60, flow rate = 0.6 mL·min<sup>-1</sup>, 25 °C; (b, d, e, m, v) ACN/H<sub>2</sub>O (v/v)=30/70, flow rate = 0.6 mL·min<sup>-1</sup>, 25 °C; (o, j) ACN/H<sub>2</sub>O (v/v)=25/75, flow rate = 0.6 mL·min<sup>-1</sup>, 25 °C; (f, l, q, t) ACN/H<sub>2</sub>O (v/v)=20/80, flow rate = 0.6 mL·min<sup>-1</sup>, 25 °C; (k, u) ACN/H<sub>2</sub>O (v/v)=15/85, flow rate = 0.6 mL·min<sup>-1</sup>, 25 °C; (n, p, s) MeOH/H<sub>2</sub>O (v/v)=50/50, flow rate = 0.6 mL·min<sup>-1</sup>, 25 °C; (r) MeOH/H<sub>2</sub>O (v/v)=30/70, flow rate = 0.6 mL·min<sup>-1</sup>, 25 °C

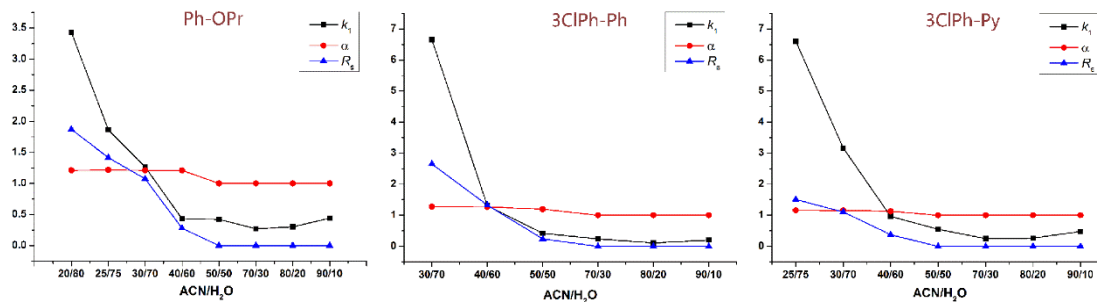

Figure S6 Effect of MP composition. Conditions:  $0.6 \text{ mL} \cdot \text{min}^{-1}$ ,  $25 \text{ }^\circ\text{C}$

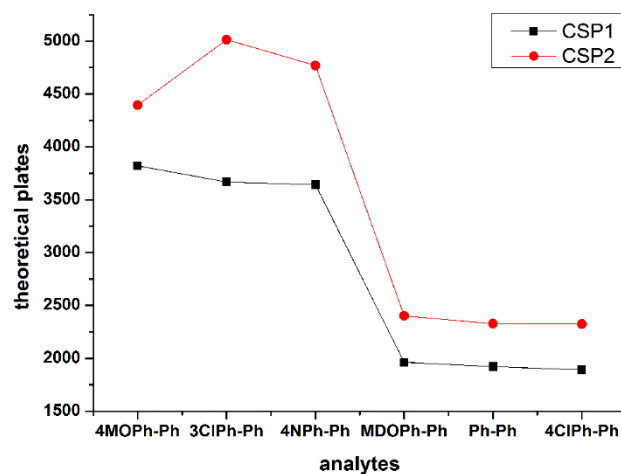

Figure S7 Comparison of column efficiency on **CSP1** and **CSP2**. Conditions: 1. ACN/H<sub>2</sub>O=30/70,  $0.6 \text{ mL} \cdot \text{min}^{-1}$ ,  $25 \text{ }^\circ\text{C}$  (4MOPh-Ph/3ClPh-Ph/4NPh-Ph) 2. ACN/H<sub>2</sub>O=40/60,  $0.6 \text{ mL} \cdot \text{min}^{-1}$ ,  $25 \text{ }^\circ\text{C}$  (MDOPh-Ph/4ClPh-Ph/Ph-Ph).

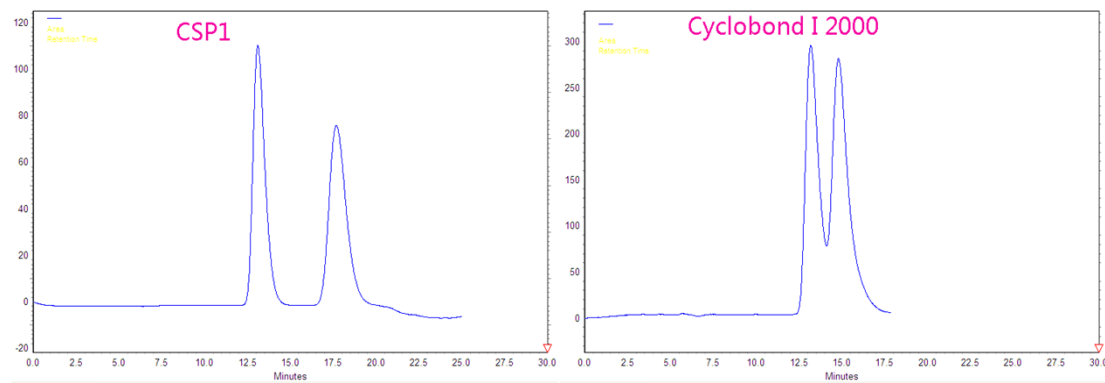

Figure S8. Comparison of enantioseparation of 4ClPh-OPr on **CSP1** and Cyclobond I 2000. Conditions: flow rate =  $0.6 \text{ mL} \cdot \text{min}^{-1}$ , MeOH/H<sub>2</sub>O=50/50 (v/v),  $25 \text{ }^\circ\text{C}$ .
